# Supplementary material for: SIRT5 Sustains Stemness and Promotes Metastasis and Angiogenesis in Cervical Cancer via Activation of the TGF-β Signaling Pathway
Source: Research Square preprint supplement (doi:10.21203/rs.3.rs-8614743/v1), 2026-02-18
Supplement: Supplementary file 1 [file 4d49be7bac5b5322d112acd5.docx]

Correlation between SIRT5 expression and clinicopathological characteristics

|  | Variables | SIRT5 expression | | total | Χ2 | p value |
| --- | --- | --- | --- | --- | --- | --- |
|  | low | High |
| Age (year) |  |  |  |  | 0.07 | 0.792 |
|  | ≤45 | 38 | 20 | 58 |  |  |
|  | ＞45 | 36 | 21 | 57 |  |  |
|  | Null |  |  |  |  |  |
| Pathologic type |  |  |  |  | 1.071 | 0.301 |
|  | Non-SCC | 7 | 1 | 8 |  |  |
|  | SCC | 67 | 40 | 107 |  |  |
| N |  |  |  |  | 0.006 | 0.938 |
|  | N0 | 60 | 33 | 93 |  |  |
|  | N1 | 14 | 8 | 22 |  |  |
| Ki67 |  |  |  |  | 0.03 | 0.863 |
|  | Negative | 3 | 2 | 5 |  |  |
|  | positive | 16 | 5 | 21 |  |  |
|  |  |  |  |  |  |  |
| grade |  |  |  |  | 5.068 | 0.024 |
|  | I/II | 18 | 4 | 22 |  |  |
|  | III | 42 | 34 | 76 |  |  |
|  | Null |  |  |  |  |  |
| HPV16 |  |  |  |  | 0.256 | 0.613 |
|  | no | 48 | 23 | 71 |  |  |
|  | yes | 20 | 12 | 32 |  |  |
|  | Null |  |  |  |  |  |
| T |  |  |  |  | 0.009 | 0.922 |
|  | T1/T2 | 59 | 33 | 92 |  |  |
|  | T3/T4 | 15 | 8 | 23 |  |  |
|  | Null |  |  |  |  |  |
| stage |  |  |  |  | 0.009 | 0.922 |
|  | I/II | 59 | 33 | 92 |  |  |
|  | III/IV | 15 | 8 | 23 |  |  |
|  | Null |  |  |  |  |  |
